# Supplementary material
Source: PubMed Central journal article supplement (PMC4071379)
Supplement: JCI74556.sd.pdf [file JCI74556.sd.pdf]

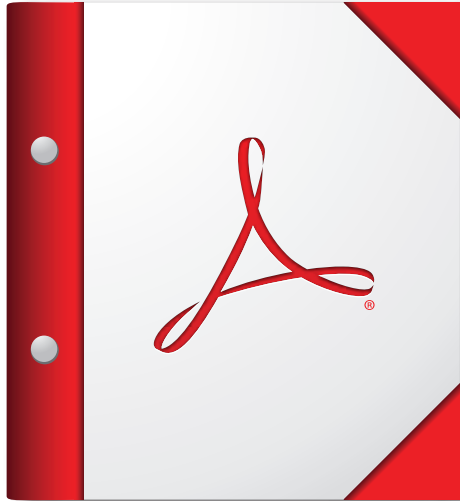

**For the best experience, open this PDF portfolio in  
Acrobat X or Adobe Reader X, or later.**

[Get Adobe Reader Now!](#)
